# Supplementary material for: An in vitro affinity-based method for studying herb–drug interactions for direct identification of cytochrome P450 1A2, 3A4, and 2C9 specific ligands from herbal extracts using ultrafiltration-high performance liquid chromatography
Source: Royal Society of Chemistry journal article supplement (doi:10.1039/c7ra12161j), 2018-01-01
Supplement: c7ra12161j1.pdf [file c7ra12161j1.pdf]

Supplementary materials

Table S1. The root-mean-square deviation (RMSD) for CYP1A2, 2C9, and 3A4.

| CYP isoform | RMSD     |
|-------------|----------|
| 1A2         | 0.413931 |
| 2C9         | 0.020090 |
| 3A4         | 1.454134 |

Table S2 The total scores of CYP isoforms-ligands molecular docking

| CYP isoform | Probe <sup>1</sup> | Dihydrotanshinone | Tanshinone I | Cryptotanshinone | Tanshinone IIA |
|-------------|--------------------|-------------------|--------------|------------------|----------------|
| 1A2         | 8.1835             | 8.7425            | 8.6532       | 5.9218           | 6.4312         |
| 2C9         | 5.0936             | 3.5947            | 5.0060       | 2.6552           | 4.0515         |
| 3A4         | 16.4210            | 4.4355            | 3.8878       | 6.1238           | 4.9618         |

<sup>1</sup> $\alpha$ -Naphthoflavone, sulfaphenazole, and ketoconazole are probes for CYP 1A2, 2C9, and 3A4, respectively.
